# Supplementary material for: Protocol of a multicentric prospective cohort study for the VALIDation of the IBD-disk instrument for assessing disability in inflammatory bowel diseases: the VALIDate study
Source: Springer Nature journal article supplement (doi:10.1186/s12876-020-01246-7), 2020-04-16
Supplement: MOESM3 [file 17902382]

# Questionnaire et disque de score

Nom du patient

Numéro

Date

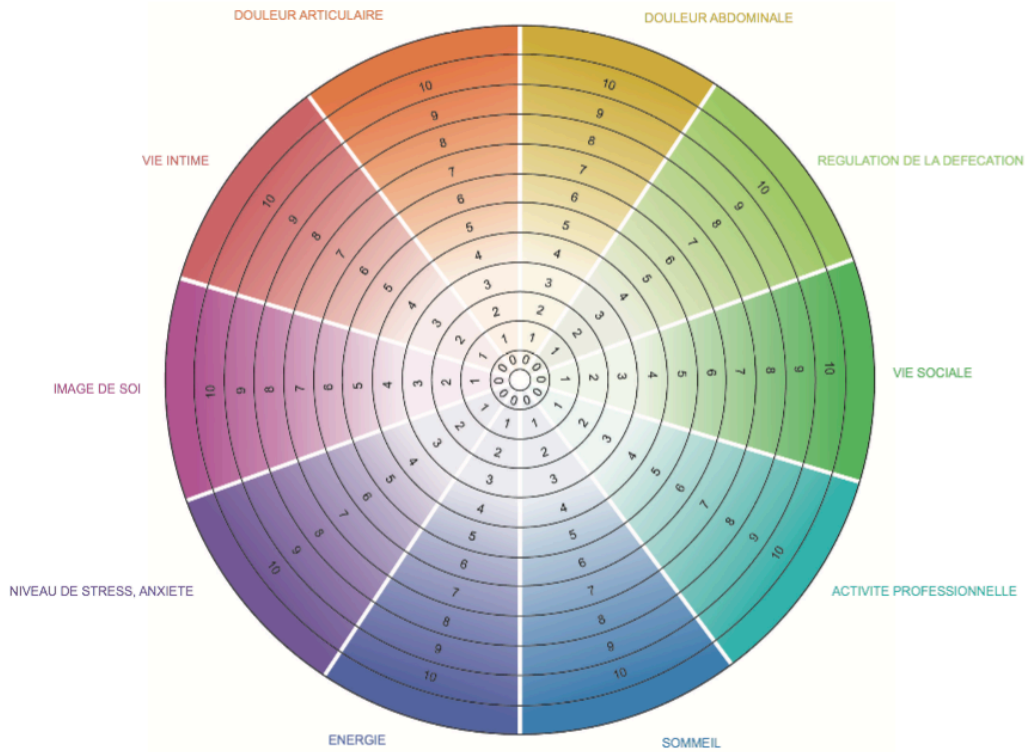

Evaluer (de 1 à 10) et entourer sur le disque votre niveau d'accord pour chacun des items

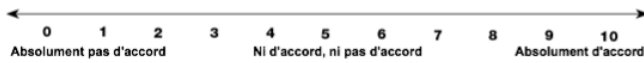

Score Total: \_\_\_\_\_

Indiquez ici le score cumulé des 10 items

## Au cours des 7 derniers jours :

- DOULEUR ABDOMINALE** J'ai eu des douleurs au niveau de l'abdomen et/ou de l'estomac
- REGULATION DE LA DEFECATION** J'ai eu des selles impérieuses que j'ai eu du mal à gérer, trouver des toilettes à temps a été un problème et j'ai parfois eu des difficultés d'essuyage/nettoyage.
- VIE SOCIALE** J'ai eu des difficultés dans ma relation aux autres et/ou des difficultés d'intégration dans la communauté
- VIE PROFESSIONNELLE** J'ai eu des difficultés dans mes activités professionnelles, ou dans mes études ou dans la réalisation de tâches quotidiennes liées à la gestion de la maison
- SOMMEIL** J'ai des difficultés de sommeil, par exemple des problèmes d'endormissement, des réveils nocturnes fréquents ou des réveils très matinaux sans possibilité de rendormissement
- ENERGIE** Je ne me suis jamais senti(e) véritablement reposé(e), j'ai manqué d'énergie, je me suis senti(e) fatigué(e)
- NIVEAU DE STRESS, ANXIETE** Je me suis senti(e) triste, mon moral a été bas, ou je me suis senti(e) déprimé(e) et/ou inquiet et/ou anxieux
- IMAGE DE SOI** Je n'aime pas mon corps ou certaines parties de mon corps
- VIE INTIME** J'ai eu des difficultés d'ordre psychologique et/ou physique dans ma sexualité
- DOULEUR ARTICULAIRE** Mes articulations me font souffrir
